# Supplementary material for: Cytosine methylation changes in enhancer regions of core pro-fibrotic genes characterize kidney fibrosis development
Source: PubMed Central journal article supplement (PMC4053753; doi:10.1186/gb-2013-14-10-r108), 2013-10-07
Supplement: gb-2013-14-10-r108-S2.pdf [file gb-2013-14-10-r108-S2.pdf]

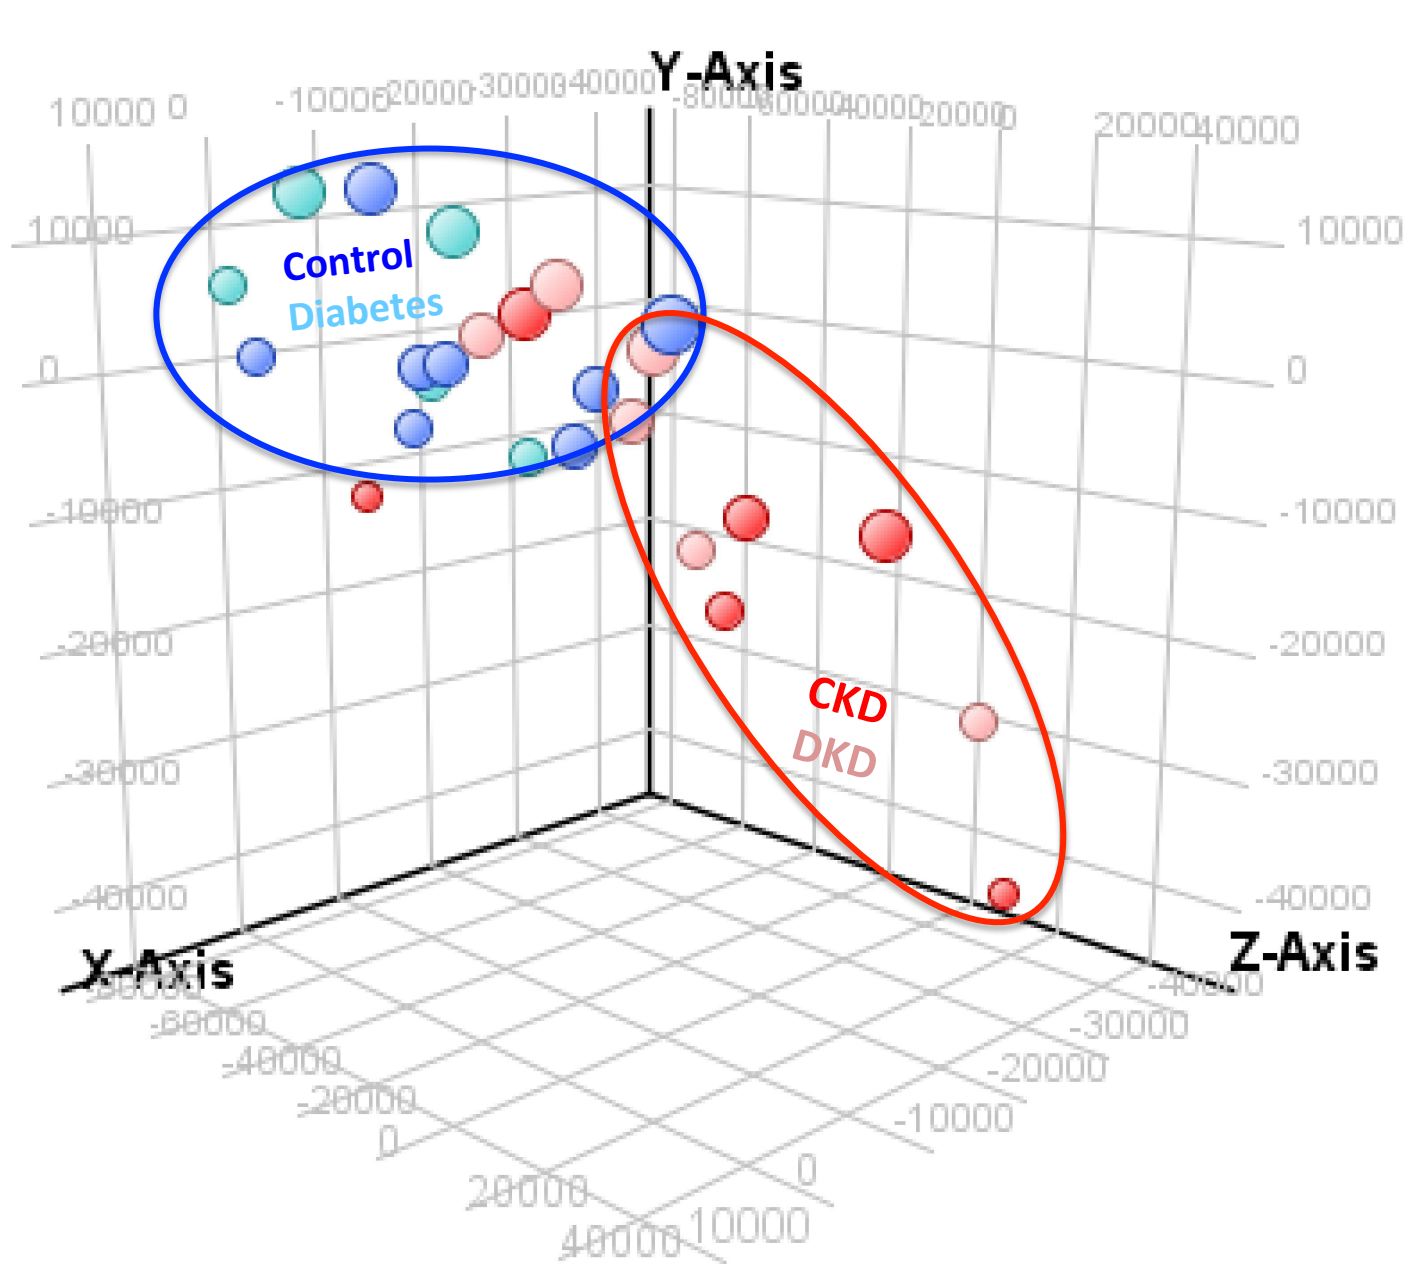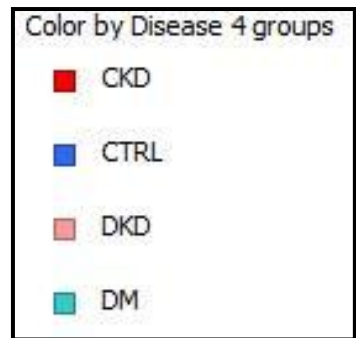

Supplemental Figure 2: Technical Validation

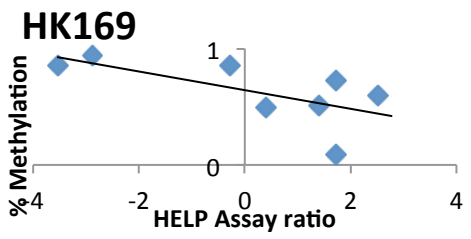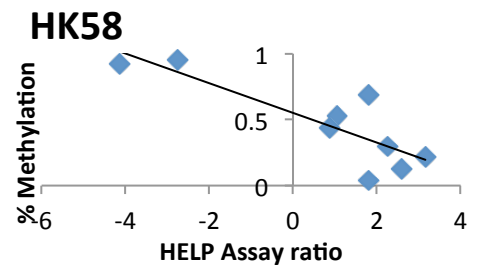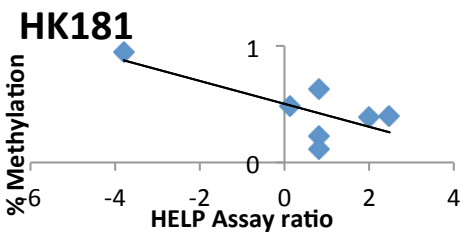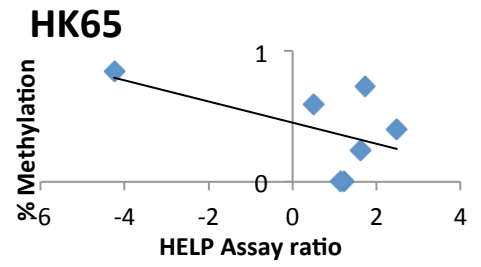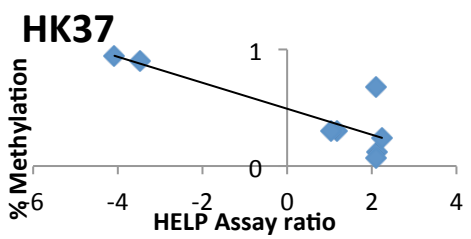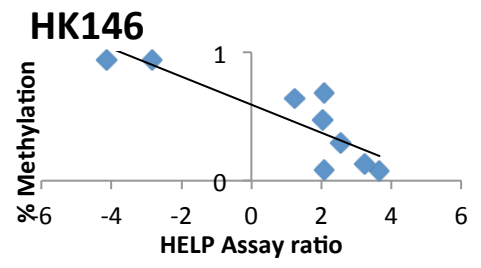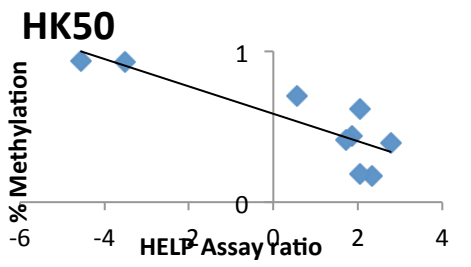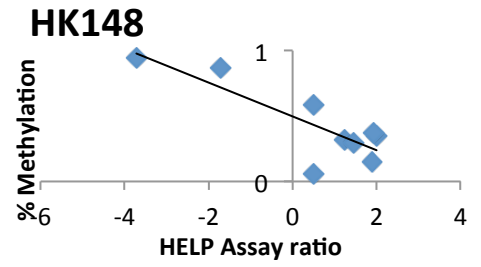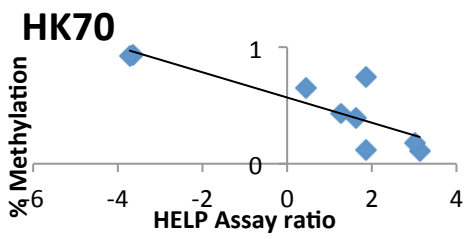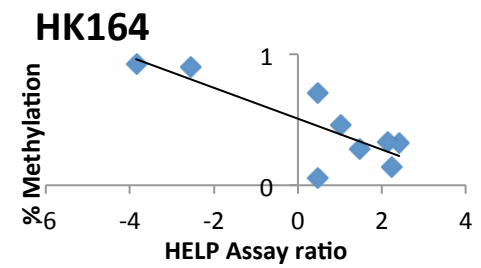

Supplemental Figure 3

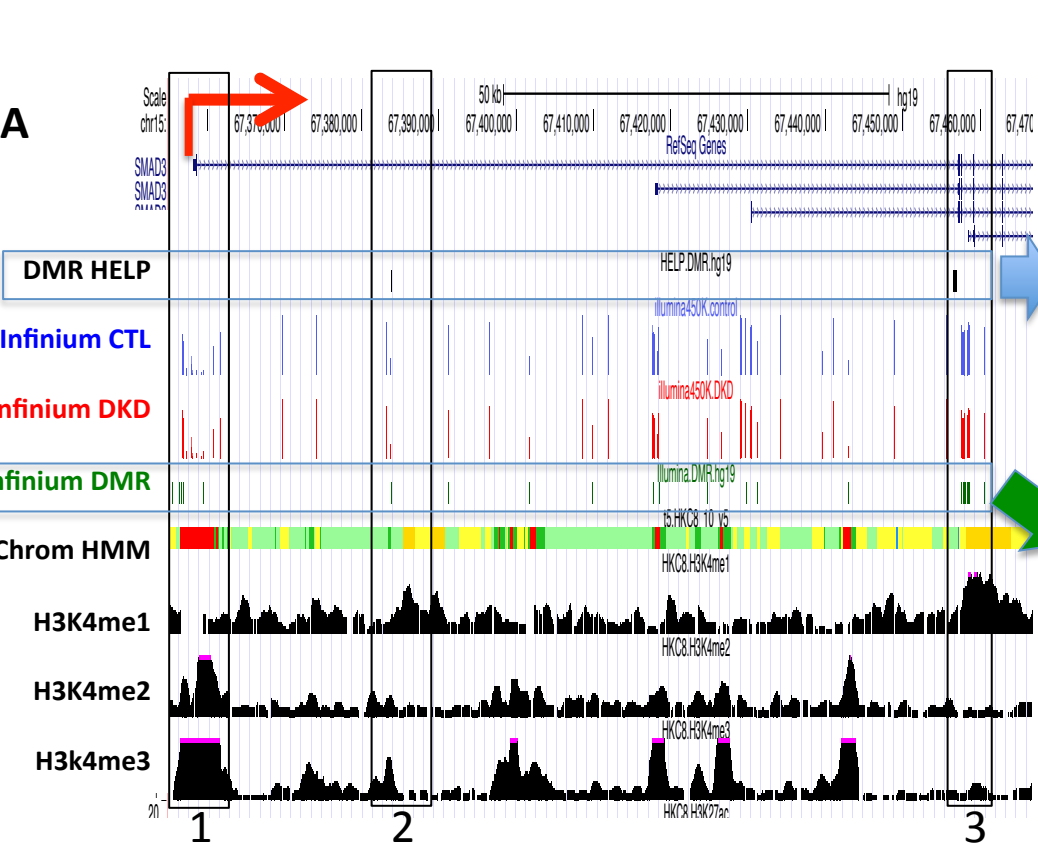

**B** CTL vs. CKD (HELP)

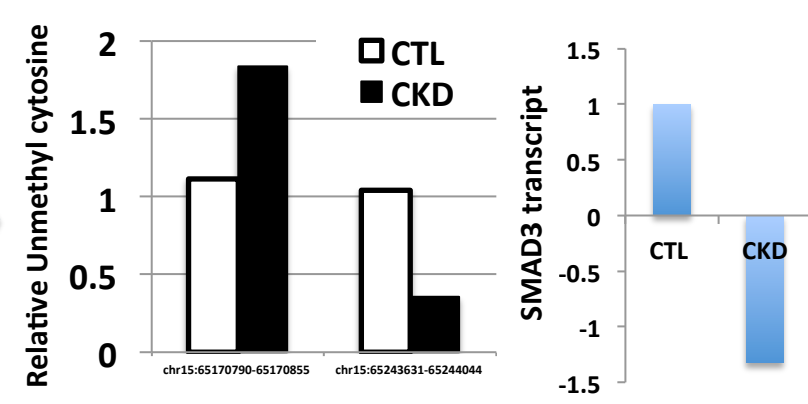

**C** CTL vs. DKD (Infinium)

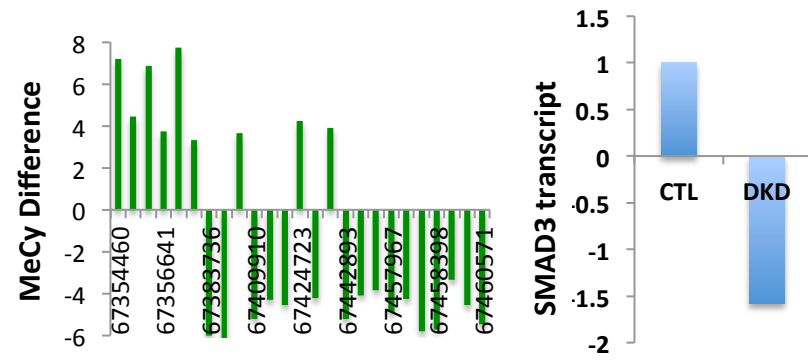

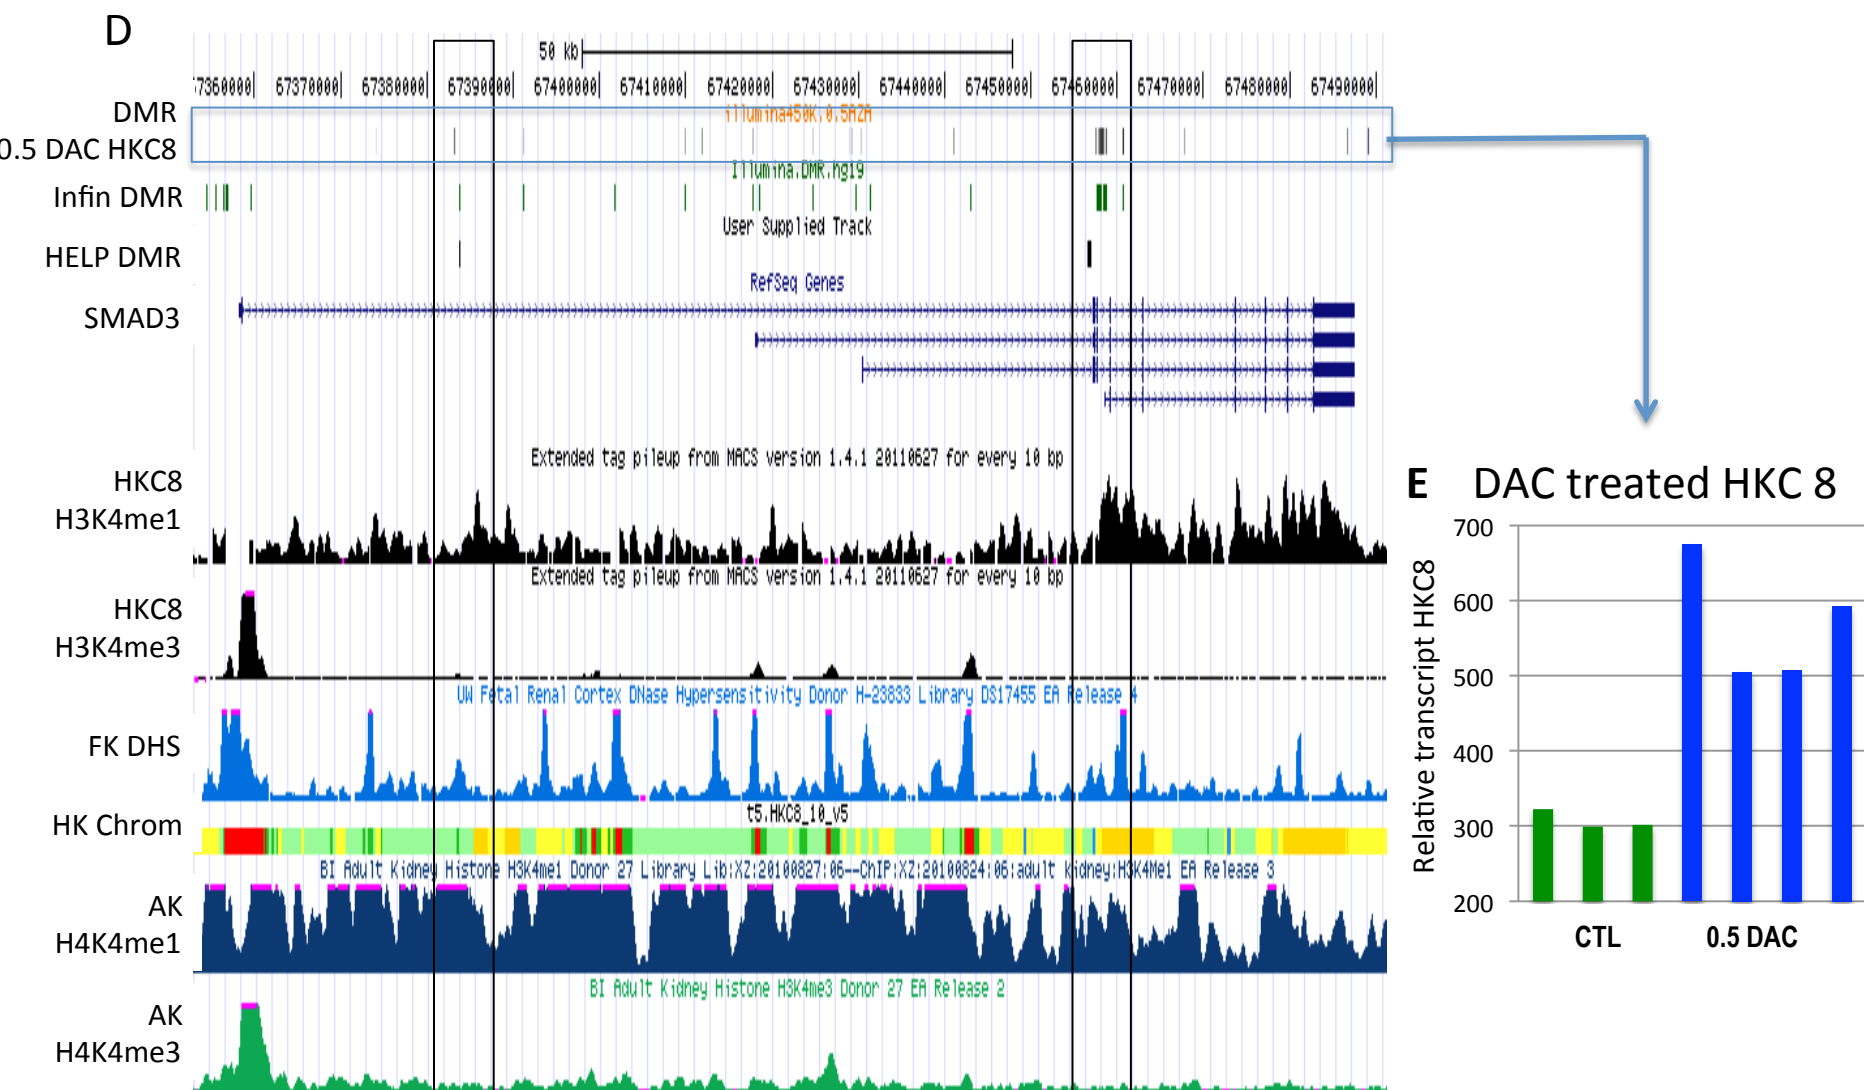

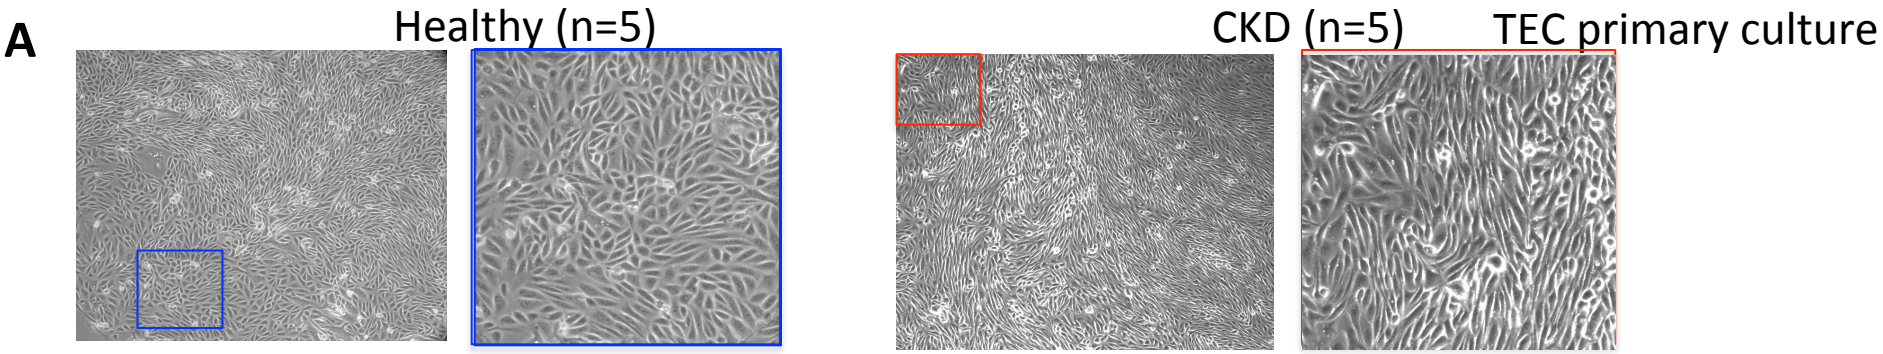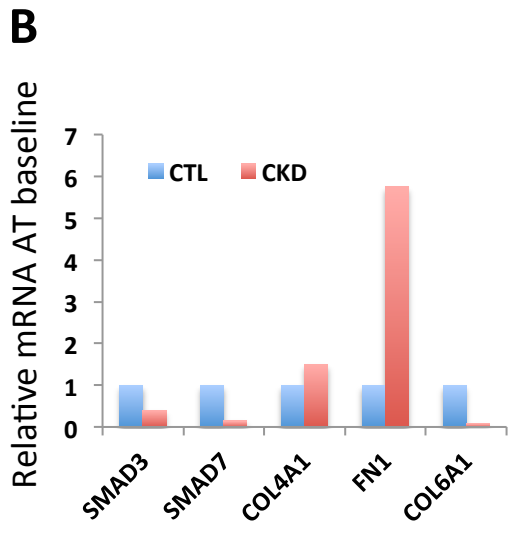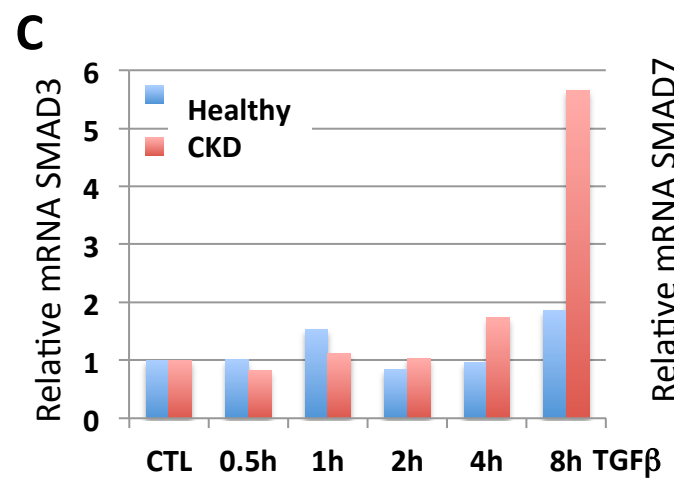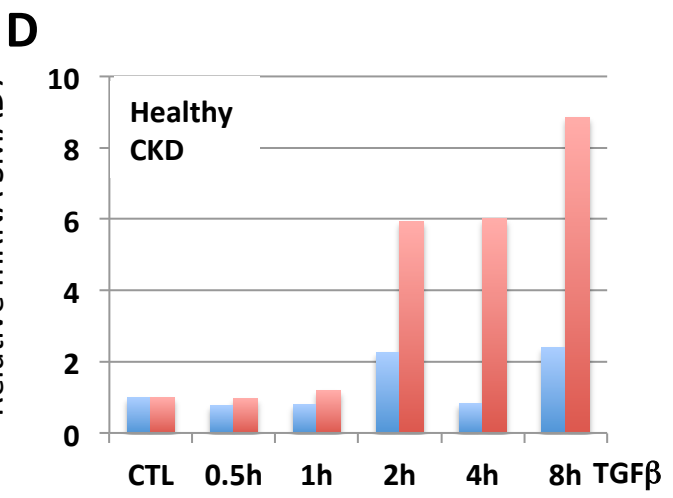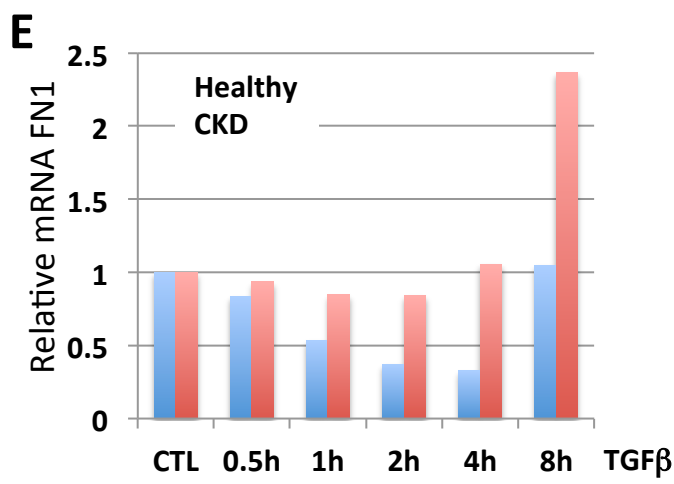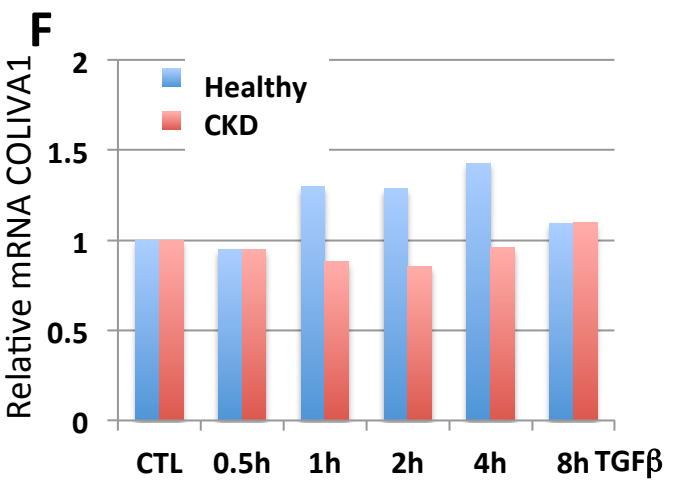

Supplemental Figure 4

Supplemental Figure 4

**G**

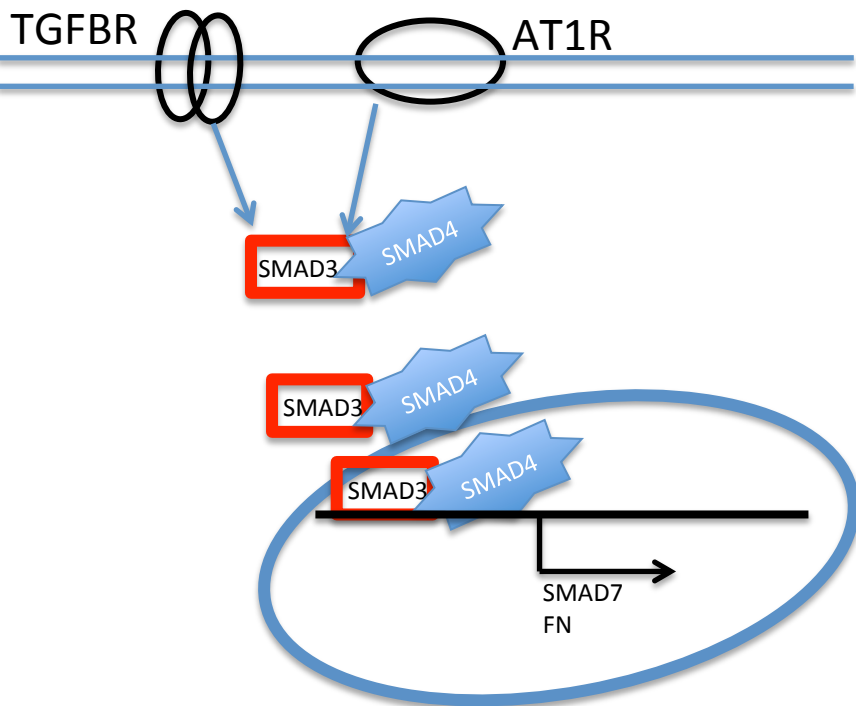

**H**

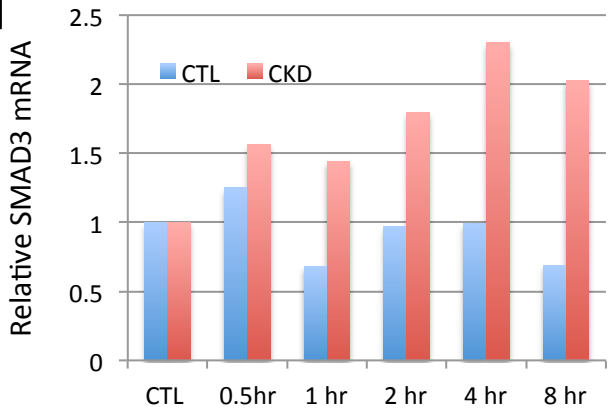

**I**

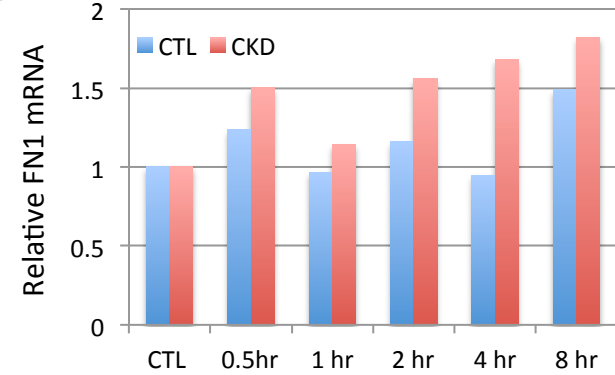

**J**

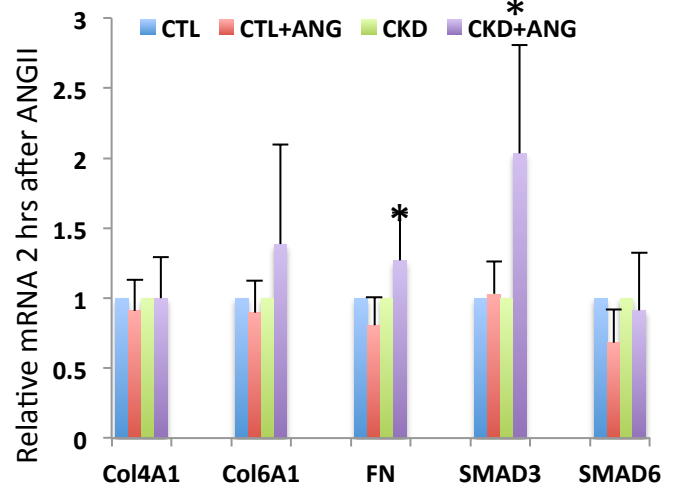

# HEALTHY/NORMAL

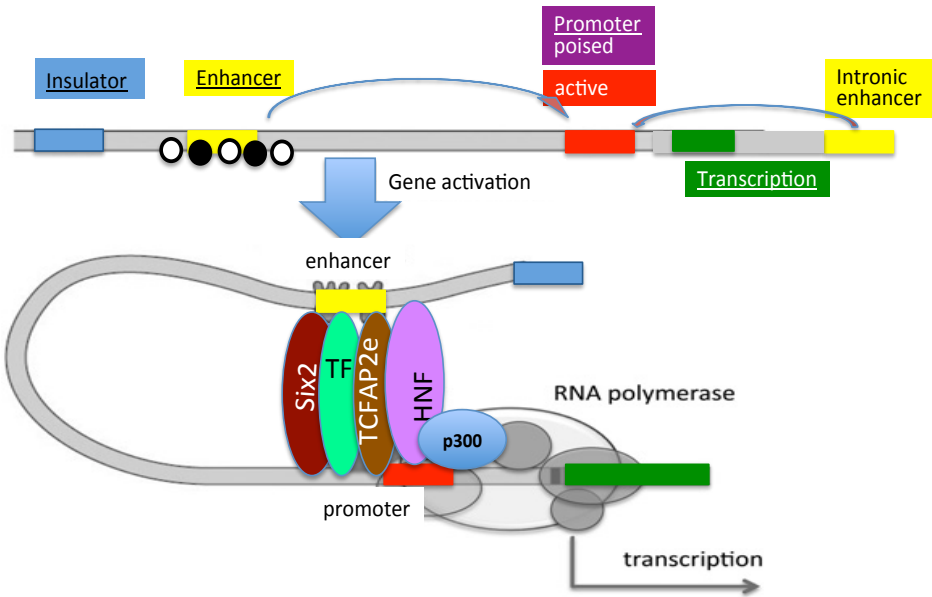

Correct Cytosine methylation  
Correct signal strength

# CKD

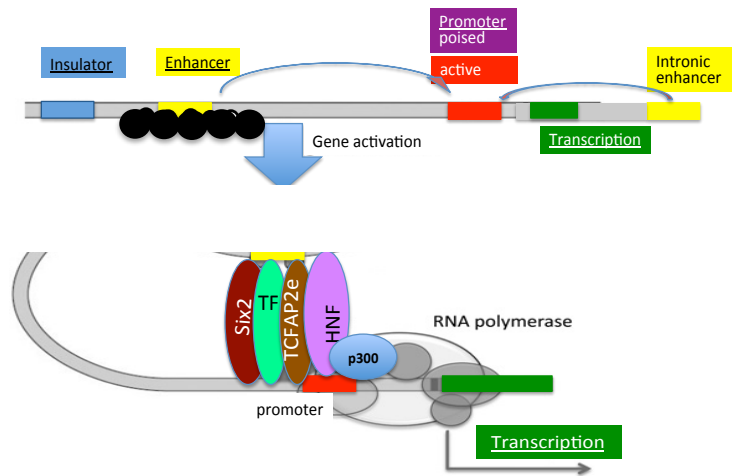

Increased cytosine methylation of enhancer decreased signal strength

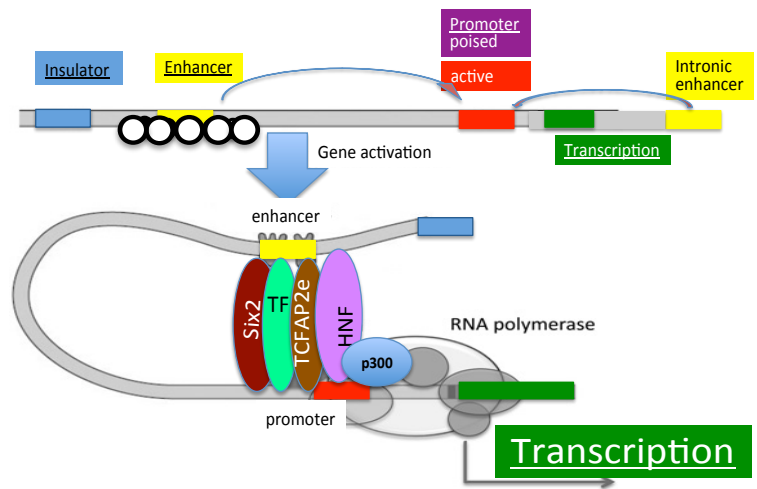

Loss of cytosine methylation of enhancer increased signal strength

Variable/incorrect signal strength
