# Supplementary material for: Cytosine methylation changes in enhancer regions of core pro-fibrotic genes characterize kidney fibrosis development
Source: PubMed Central journal article supplement (PMC4053753; doi:10.1186/gb-2013-14-10-r108), 2013-10-07

Supplemental Figure 2: Technical Validation

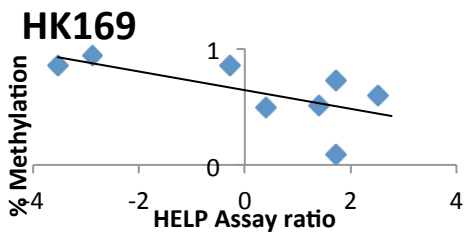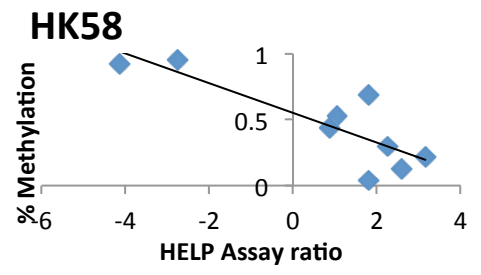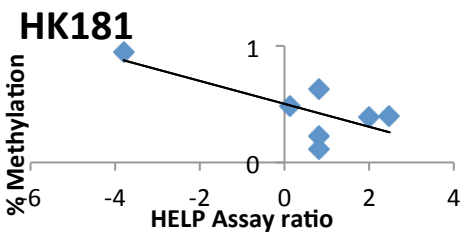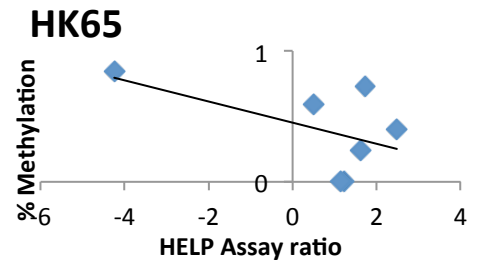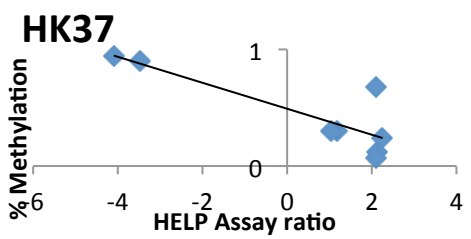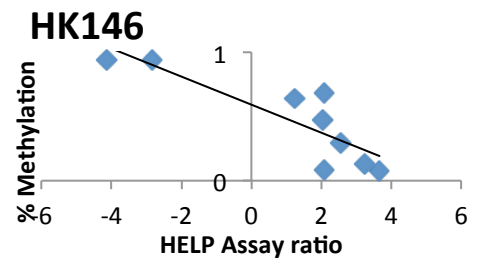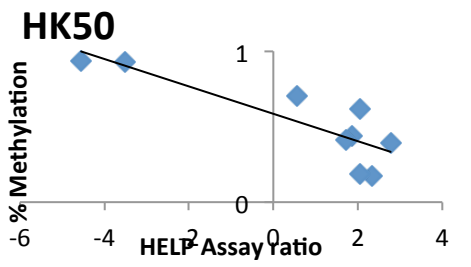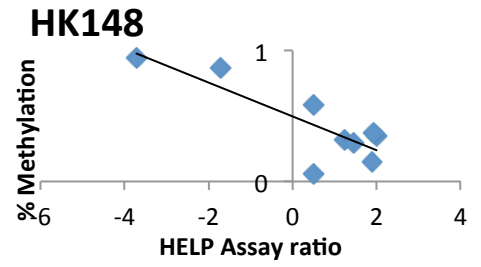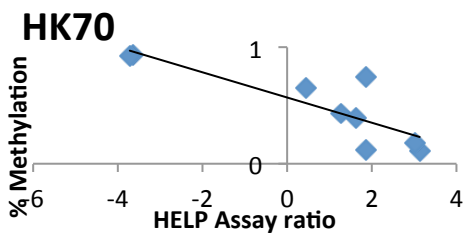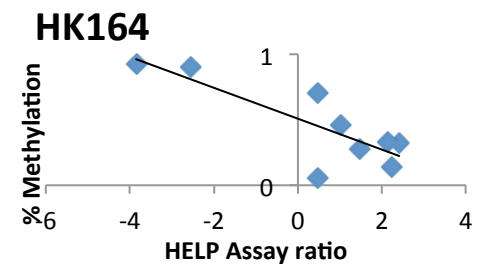

Supplement: gb-2013-14-10-r108-S4.pdf [file gb-2013-14-10-r108-S4.pdf]
